# Supplementary material
Source: PubMed Central journal article supplement (PMC2781479)

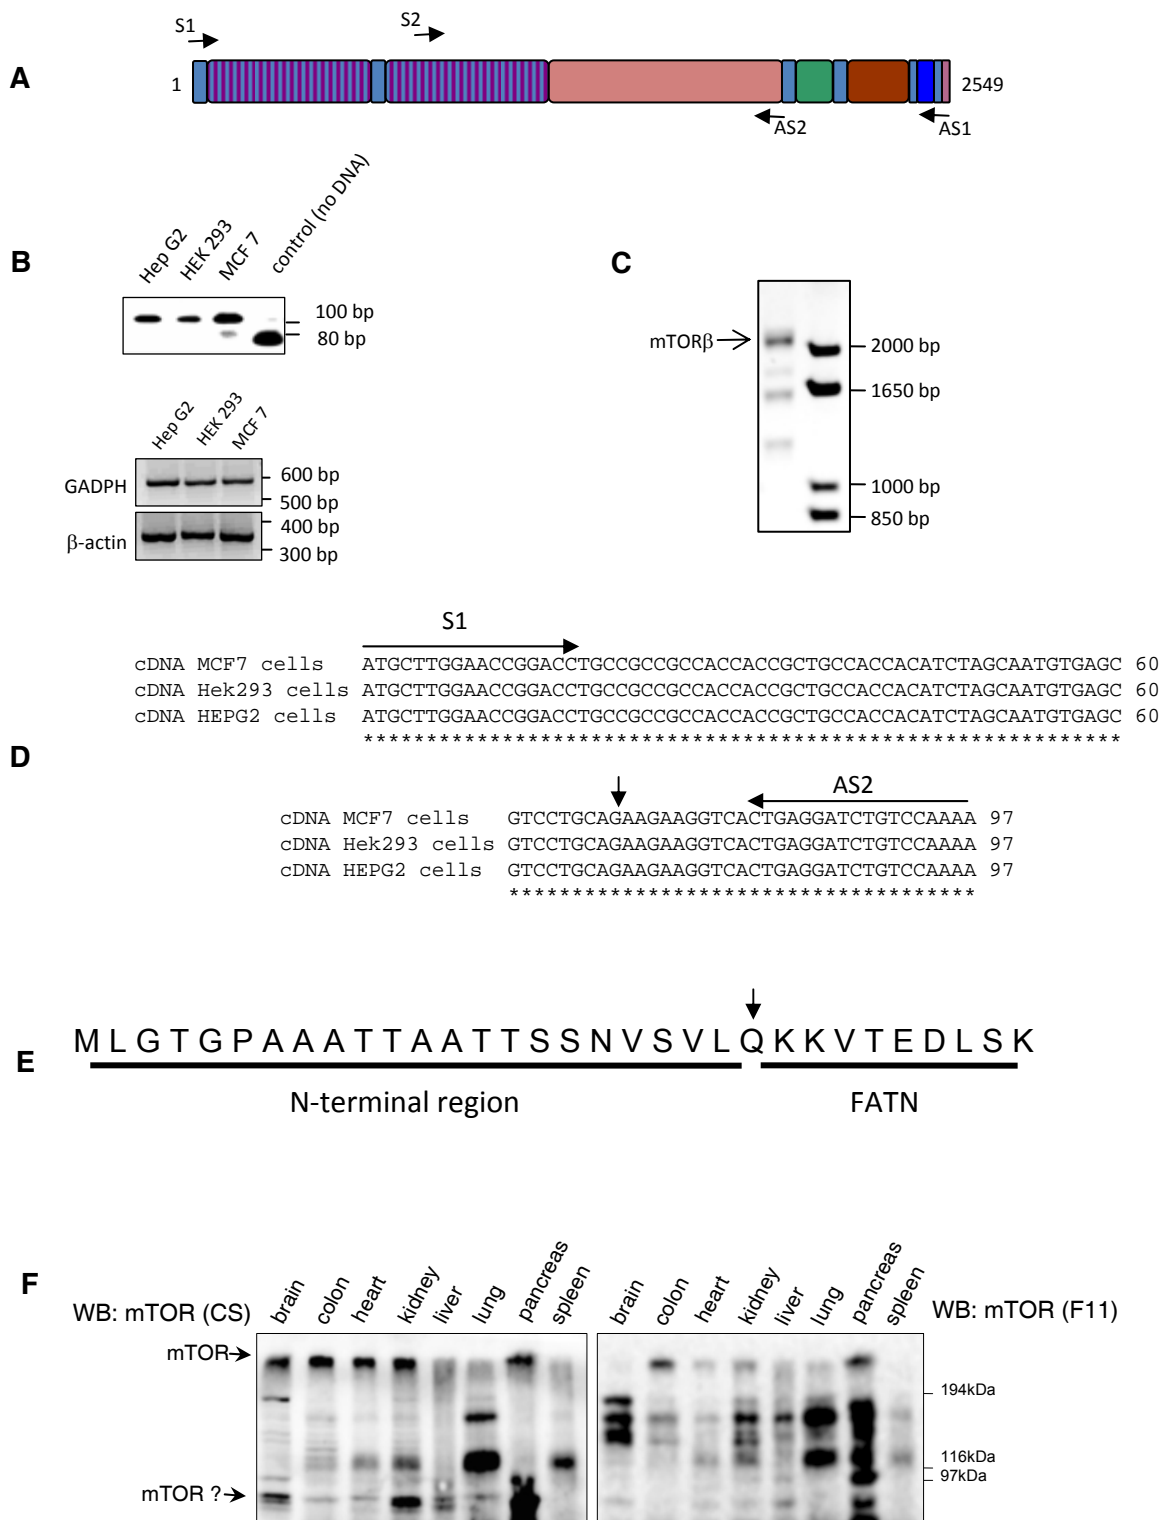

Supplementary fig. 1

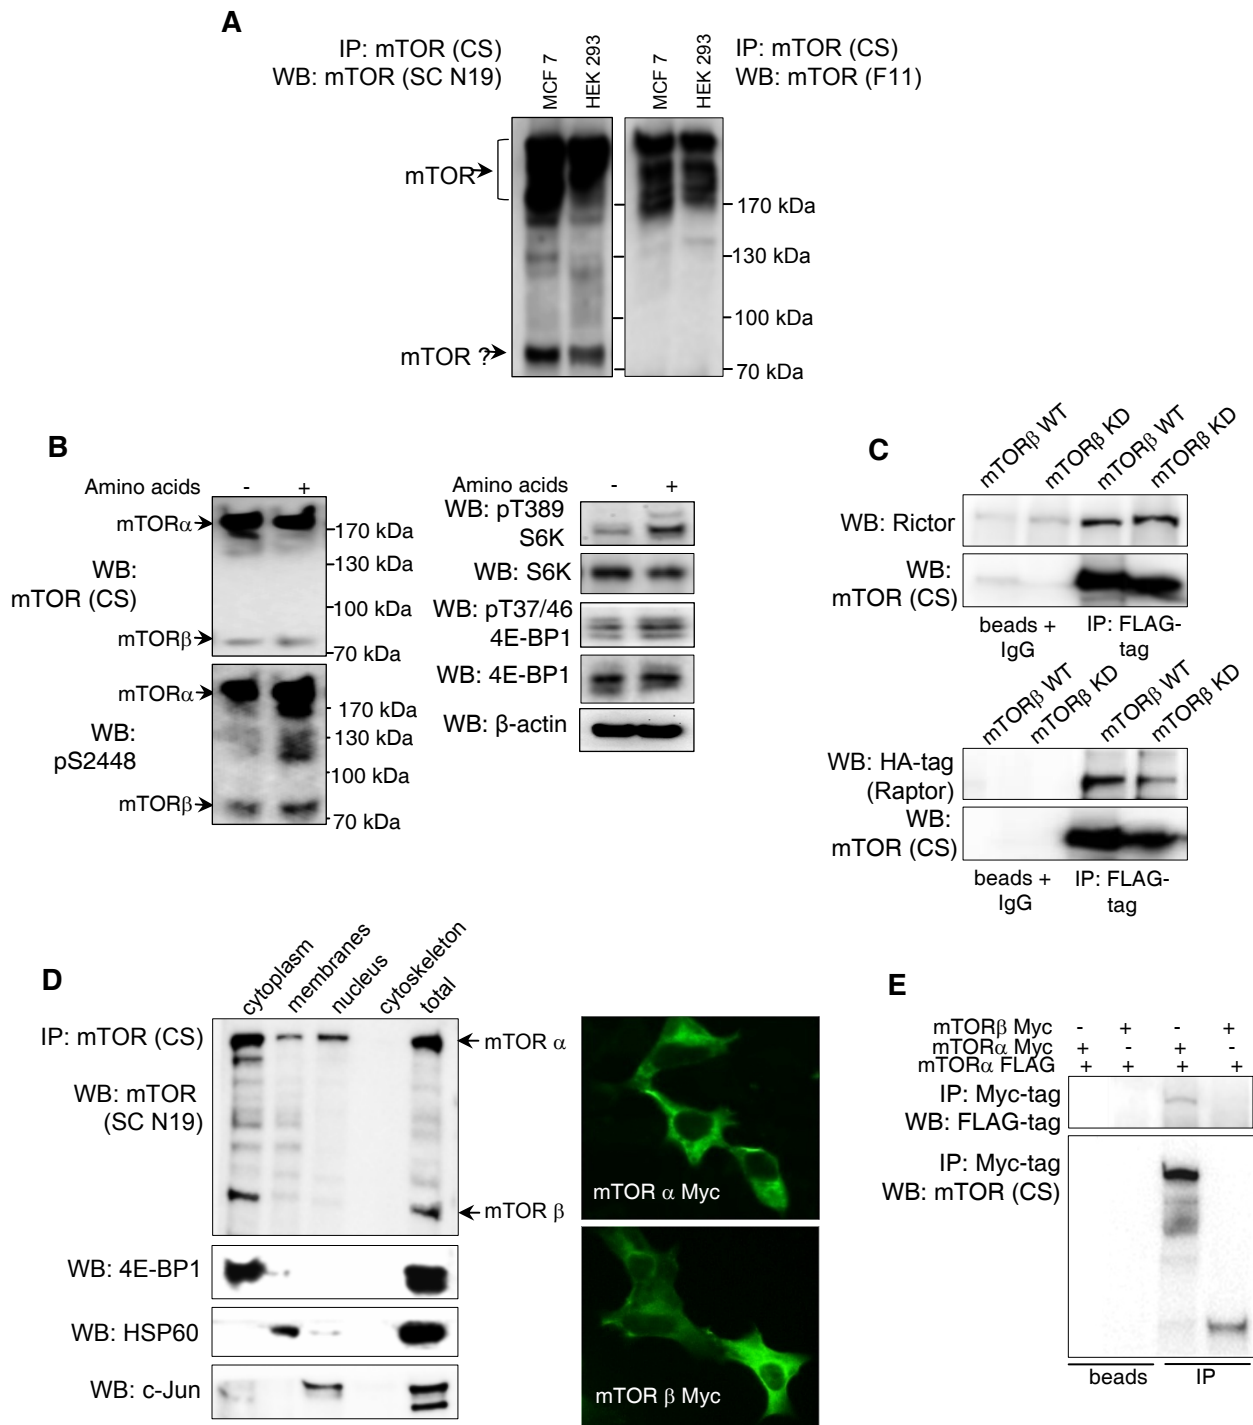

Supplementary fig. 2

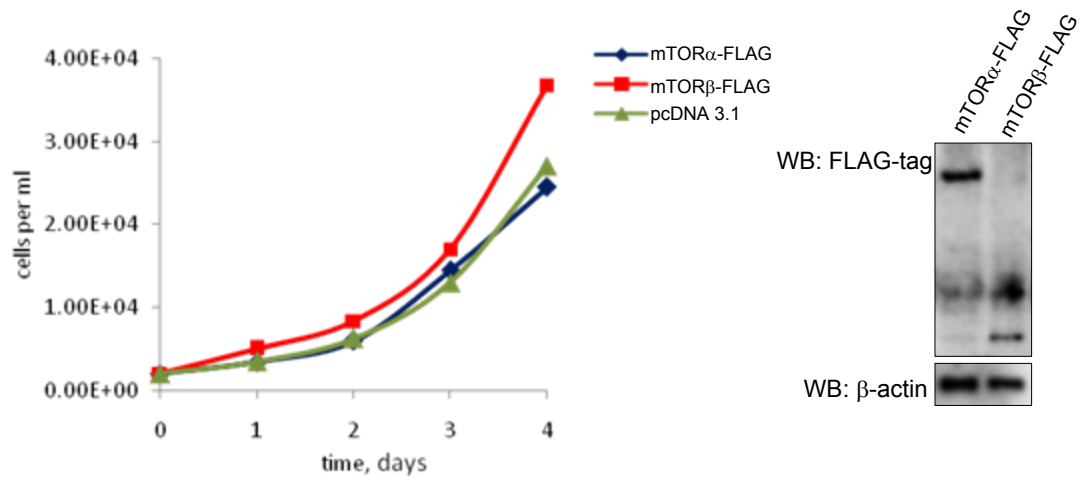

Supplementary fig. 3

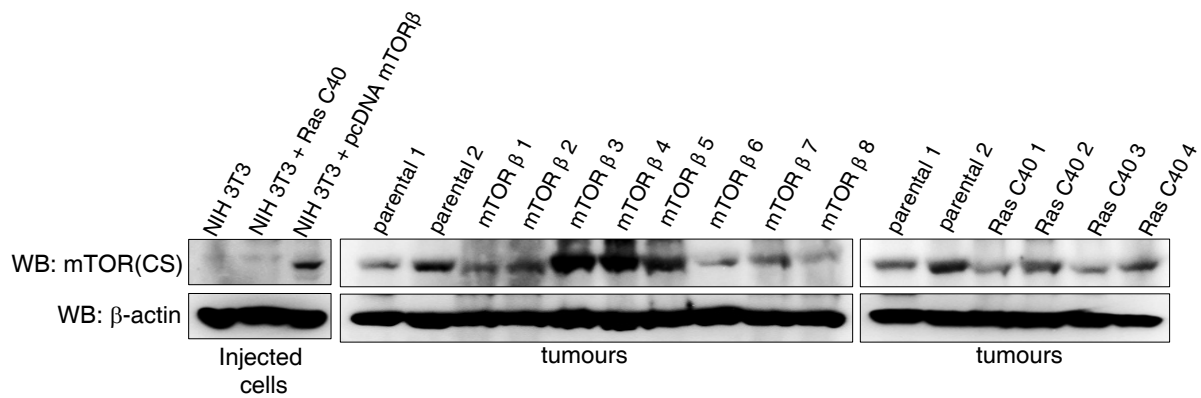

Supplementary fig. 4

Supplement: supp_M109.056085_jbc.M109.056085-1.pdf [file supp_M109.056085_jbc.M109.056085-1.pdf]
